# Supplementary material
Source: publisher site journal article supplement (https://www.dovepress.com/article/supplementary_file/586107/586107_Appendix.docx)
Supplement: Supplementary file 1 [file 586107_Appendix.docx]

Appendix A:

**Semi-Structured Interview Protocol**

**Interview Preparation and Introduction**

The interviews were conducted by the principal researcher, a paediatrician with direct experience in postgraduate medical education in Kuwait and familiarity with the residency training environment. At the time of the study, the researcher held no formal evaluative role within the residency program but had professional interactions with residents and tutors during clinical work.

At the beginning of each interview, participants were informed about:

- the purpose of the study,
- voluntary participation,
- confidentiality and anonymity,
- the right to withdraw at any time,
- and an audio recording of the interview.

Written informed consent was obtained before the interview commenced.

**Interview Process**

Data collection was conducted between July 2022 and September 2022. Most interviews were conducted face-to-face in private hospital offices or meeting rooms, while three interviews were conducted online because participants were working in different hospitals.

A semi-structured interview approach was used to allow flexibility and encourage participants to discuss their experiences in depth. Open-ended questions were supported by probing questions when clarification or elaboration was needed.

Examples of probes included:

- “Can you give an example?”
- “How did that affect you?”
- “What happened next?”
- “Can you explain further?”

Interviews were audio-recorded with participants’ permission and later transcribed manually by the principal researcher.

**Semi-Structured Interview Questions**

| **No.** | **Interview Question** |
| --- | --- |
| 1 | Can you describe your experience of receiving feedback during your paediatric postgraduate training? |
| 2 | Can you tell me about the different situations in which you usually receive feedback? |
| 3 | Can you describe your experience of receiving feedback after a significant professional or clinical event? |
| 4 | Can you tell me about the people from whom you usually receive feedback? |
| 5 | Can you describe your experience of giving feedback to colleagues or other healthcare staff? |
| 6 | How has feedback influenced your learning, professional development, or career progression? |
| 7 | In your opinion, what makes feedback effective or meaningful? |
| 8 | Can you describe situations where feedback was specific, supportive, or focused on improvement? |
| 9 | Can you describe the most helpful feedback you have ever received? What made it helpful? |
| 10 | Can you describe a negative feedback experience? How did it affect you emotionally and professionally? |
| 11 | Have you observed colleagues being affected by poor feedback experiences? Can you describe what you noticed? |
| 12 | What factors do you think influence whether tutors provide effective feedback? |
| 13 | What do you think contributes to feedback being delivered in an ineffective or unhelpful way? |
| 14 | In your opinion, what is the best timing or setting for feedback? |
| 15 | If you were responsible for the training program, how would you improve the feedback process? |

**Closing**

At the end of each interview, participants were invited to share any additional comments or reflections regarding their feedback experiences. Participants were thanked for their time and contribution to the study.
